# Supplementary material for: 3,4,5-Tricaffeoylquinic acid induces adult neurogenesis and improves deficit of learning and memory in aging model senescence-accelerated prone 8 mice
Source: publisher site journal article supplement (doi:10.18632/aging.101748), 2019-01-17
Supplement: Supplementary file [file aging-v11i2-101748-supplementary-material-SD1.pdf]

## SUPPLEMENTARY MATERIAL

**Supplementary Table 1. Expression changes of Actin cytoskeleton-related genes regulated by 3,4,5-triCaffeoylquinic acid (TCQA).**

| Gene title                                              | Gene symbol | Fold change | Function                                                                                                                                                                       | Category           |
|---------------------------------------------------------|-------------|-------------|--------------------------------------------------------------------------------------------------------------------------------------------------------------------------------|--------------------|
| EH Domain Binding Protein 1                             | EHBP1       | 1.63        | actin binding, alternative splicing                                                                                                                                            | Actin cytoskeleton |
| Protein Kinase N2                                       | PKN2        | 1.40        | inhibits Akt pro-survival-induced kinase activity, cell cycle progression, actin cytoskeleton assembly, cell migration, cell adhesion                                          |                    |
| Radixin                                                 | RDX         | 1.40        | regulation of actin polymerization and de-polymerization, regulation of actin length                                                                                           |                    |
| Transmembrane Protein 106B                              | TMEM106B    | 1.39        | dendrite morphogenesis                                                                                                                                                         |                    |
| Kinectin 1                                              | KTN1        | 1.37        | microtubule-based process, microtubule-based movement, actin cytoskeleton                                                                                                      |                    |
| IQ Motif Containing GTPase Activating Protein 1         | IQGAP1      | 1.36        | actin cytoskeleton, calcium ion binding, binding activated cdc42, promote neurite outgrowth                                                                                    |                    |
| Actin, Alpha 2, Smooth Muscle, Aorta                    | ACTA2       | 1.35        | actin cytoskeleton                                                                                                                                                             |                    |
| CDC42 Binding Protein Kinase Alpha                      | CDC42BPA    | 1.30        | cytoskeleton organization, protein kinase activity, zinc ion binding                                                                                                           |                    |
| Kelch Like Family Member 17                             | KLHL17      | 1.29        | regulation of actin cytoskeleton organization, activation of protein kinase activity, this protein may play a key role in the regulation of actin-based neuronal function.     |                    |
| Coiled-Coil Domain Containing 88A                       | CCDC88A     | 1.28        | plays a role in cytoskeleton remodeling and cell migration, correct neuron positioning, dendritic development and synapse formation                                            |                    |
| Junction Mediating And Regulatory Protein, P53 Cofactor | JMY         | 1.27        | stem cell differentiation, acts both as a nuclear p53/TP53-cofactor and a cytoplasmic regulator of actin dynamics, may promote the rapid formation of a branched actin network |                    |
| LanC Like 2                                             | LANCL2      | 1.25        | cortical actin cytoskeleton                                                                                                                                                    |                    |
| transforming acidic coiled-coil-containing protein 1    | TACC1       | 1.25        | microtubule cytoskeleton, cell cycle                                                                                                                                           |                    |
| Protein Phosphatase 1 Regulatory Subunit 12A            | PPP1R12A    | 1.25        | phosphoprotein phosphatase activity, ankyrin, actin cytoskeleton                                                                                                               |                    |
| Dynein Cytoplasmic 1 Light Intermediate Chain 2         | DYNC1LI2    | 1.25        | microtubule cytoskeleton, microtubule motor activity                                                                                                                           |                    |
| Dynein Cytoplasmic 1 Heavy Chain 1                      | DYNC1H1     | 1.23        | microtubule cytoskeleton organization, cell cycle, microtubule motor activity                                                                                                  |                    |
| Tropomyosin 4                                           | TPM4        | 1.22        | actin cytoskeleton                                                                                                                                                             |                    |
